# Supplementary material for: Work-related stress: the impact of COVID-19 on critical care and redeployed nurses: a mixed-methods study
Source: HighWire-hosted journal article supplement (doi:10.1136/bmjopen-2021-051326), 2021-07-01
Supplement: bmjopen-2021-051326supp001_data_supplement.pdf [file bmjopen-2021-051326supp001_data_supplement.pdf]

**Interview Schedule: Work-related stress: The Impact of COVID-19 on Critical Care and Redeployed Nurses: A mixed methods study**

|                                                         |                                                                                                                                                                                                                                                                                                                                                                                                                                                                                             |
|---------------------------------------------------------|---------------------------------------------------------------------------------------------------------------------------------------------------------------------------------------------------------------------------------------------------------------------------------------------------------------------------------------------------------------------------------------------------------------------------------------------------------------------------------------------|
| <b>Opening/Background Questions</b>                     | <ul style="list-style-type: none"> <li>To begin, could you tell me a little bit about you and your role?</li> <li>Were you originally trained to work in critical care, or have you been re-deployed from another part of the hospital?</li> </ul>                                                                                                                                                                                                                                          |
| <b>Experience of working in ICU during the pandemic</b> | <ul style="list-style-type: none"> <li>Can you tell me about your experience of working in critical care during the pandemic?</li> </ul> <p><b>Follow-up</b> - Could you describe how your typical working day has changed since the pandemic started?</p>                                                                                                                                                                                                                                  |
| <b>What are the main challenges?</b>                    | <ul style="list-style-type: none"> <li>Thinking back to your experiences of working in ICU during the pandemic can you tell me about any challenges/ the main challenges that you faced in your job?</li> </ul> <p><b>Follow-up</b> - How did that make you feel?</p> <ul style="list-style-type: none"> <li>Can you describe how <b>these challenges are different</b> from the kinds of challenges you would normally experience working in critical care before the pandemic?</li> </ul> |
| <b>Job resources</b>                                    | <ul style="list-style-type: none"> <li>Was there anything that helped you and your colleagues manage these daily challenges on shift?</li> <li>Thinking back, what resources were unavailable that would have been useful to help you manage daily challenges on shift?</li> </ul>                                                                                                                                                                                                          |
| <b>Exploring best and most challenging shifts</b>       | <ul style="list-style-type: none"> <li>Can you tell me about one of your best shifts during the pandemic?</li> </ul> <p><b>Follow-up</b> - What happened that made it stand out?</p> <ul style="list-style-type: none"> <li>Can you tell me about one of the most challenging situations that you have encountered during the pandemic?</li> </ul> <p><b>Follow-up</b> - If you feel able, can you please tell me what happened that made it so challenging?</p>                            |
| <b>Impact on well-being</b>                             | <ul style="list-style-type: none"> <li>How do you feel working during the pandemic has affected you personally in terms of your own wellbeing?</li> <li>How easy or difficult was it for you to detach from work after shift?</li> <li>Is there anything that helped you to recover in between shifts?</li> </ul>                                                                                                                                                                           |

**Transition Statement:** From our first questionnaire we are aware that some staff have mentioned different wellbeing services or initiatives that were offered by their unit or the hospital throughout the pandemic. I would now like to ask you a few questions about that.

|                                           |                                                                                                                                                                                                                                              |
|-------------------------------------------|----------------------------------------------------------------------------------------------------------------------------------------------------------------------------------------------------------------------------------------------|
| <b>Identifying well-being Initiatives</b> | <ul style="list-style-type: none"> <li>• Were any "well-being initiatives/interventions" in place and available to you during the pandemic?</li> </ul> <p><b>Follow-up</b> - Can you tell me a bit more about the well-being initiative?</p> |
| <b>Effectiveness</b>                      | <ul style="list-style-type: none"> <li>• Did you find any of the well-being initiatives helpful during the pandemic?</li> </ul> <p><b>Follow-up</b> - Why do you think that was helpful/ was not helpful for you?</p>                        |
| <b>Accessibility</b>                      | <ul style="list-style-type: none"> <li>• In terms of the support measure you described, how easy or hard has it been for you to access this?</li> </ul>                                                                                      |
| <b>Gaps in provision</b>                  | <ul style="list-style-type: none"> <li>• Are there any other well-being initiatives support you would like?</li> <li>• What staff support measures do you think would be helpful in future waves of the pandemic?</li> </ul>                 |
| <b>Closing</b>                            | <ul style="list-style-type: none"> <li>• Is there anything more that you would like to tell me that I haven't asked you</li> </ul>                                                                                                           |
